# Supplementary material for: Mechanism of nitric oxide induced deamination of cytosine
Source: Royal Society of Chemistry journal article supplement (doi:10.1039/b818669c), 2009-01-01
Supplement: b818669c.pdf [file b818669c.pdf]

## Supplementary material:

# Mechanism of Nitric Oxide Induced Deamination of Cytosine

Vanessa Labet,<sup>a</sup> André Grand,<sup>a</sup> Christophe Morell,<sup>a</sup> Jean Cadet<sup>a</sup> and Leif A. Eriksson<sup>b\*</sup>

**Table S1.** Absolute energies (in Hartrees) of the molecular systems involved in the NO<sup>•</sup>-induced deamination of cytosine, calculated at the (PCM)/B3LYP/6-311G(d,p) level of theory. (E<sub>0,vac</sub>: Electronic energy in vacuum at 0K with no zero-point correction; E<sub>0+ZPE,vac</sub>: electronic energy in vacuum with the zero-point correction calculated at 298.15K and 1 atm; E<sub>vac</sub>: electronic energy in vacuum with the thermal corrections calculated at 298.15K and 1 atm; H<sub>vac</sub>: enthalpy in vacuum at 298.15K and 1 atm; G<sub>vac</sub>: Gibbs free energy in vacuum at 298.15K and 1 atm; G<sub>aq</sub>: Gibbs free energy in aqueous solution at 298.15K and 1 atm).

|                                    | E <sub>0,vac</sub> | E <sub>0+ZPE,vac</sub> | E <sub>vac</sub> | H <sub>vac</sub> | G <sub>vac</sub> | G <sub>aq</sub> |
|------------------------------------|--------------------|------------------------|------------------|------------------|------------------|-----------------|
| Cytosine                           | -395.041052        | -394.942845            | -394.936108      | -394.935163      | -394.973621      | -394.991877     |
| Cytosine-H <sub>2</sub> O          | -471.511715        | -471.387927            | -471.378587      | -471.377642      | -471.422311      | -471.436957     |
| TS0                                | -471.484062        | -471.366534            | -471.358692      | -471.357748      | -471.399043      | -471.412323     |
| Cytosine_tautomer-H <sub>2</sub> O | -471.508597        | -471.384100            | -471.375055      | -471.374111      | -471.418183      | -471.429410     |
| R                                  | -547.962691        | -547.814888            | -547.801552      | -547.800608      | -547.855816      | -547.868860     |
| I1                                 | -677.678870        | -677.522258            | -677.507303      | -677.506359      | -677.564785      | -677.636145     |
| TS1                                | -677.653457        | -677.498528            | -677.485535      | -677.484591      | -677.538629      | -677.617438     |
| I2_1                               | -677.670902        | -677.514322            | -677.499393      | -677.498449      | -677.557996      | -677.629348     |
| I2_2                               | -677.666059        | -677.509559            | -677.494890      | -677.493945      | -677.553794      | -677.625056     |
| TS2                                | -677.623313        | -677.471076            | -677.457059      | -677.456115      | -677.513215      | -677.589795     |
| I3_1                               | -677.652720        | -677.498389            | -677.483090      | -677.482146      | -677.542221      | -677.617100     |
| I3_2                               | -677.652780        | -677.499498            | -677.483311      | -677.482367      | -677.544224      | -677.620321     |
| TS3                                | -677.650628        | -677.499287            | -677.482880      | -677.481936      | -677.544730      | -677.616471     |
| P                                  | -677.790551        | -677.636071            | -677.621251      | -677.620307      | -677.680931      | -677.747082     |
| Uracil (enol form)                 | -414.902330        | -414.816200            | -414.809944      | -414.809000      | -414.846647      | -414.867911     |
| Uracil                             | -414.934611        | -414.847616            | -414.841449      | -414.840505      | -414.878037      | -414.890114     |
|                                    |                    |                        |                  |                  |                  |                 |
| H <sub>2</sub> O                   | -76.447448         | -76.426123             | -76.423288       | -76.422343       | -76.443769       | -76.448316      |
| NO <sup>+</sup>                    | -129.571276        | -129.565594            | -129.563233      | -129.562289      | -129.584776      | -129.713184     |
| N2                                 | -109.555930        | -109.550354            | -109.547994      | -109.547050      | -109.568787      | -109.564620     |

Cartesian coordinates corresponding to the B3LYP/6-311G(d,p) optimized geometries of the stationary points involved in the NO<sup>•</sup>-induced deamination of cytosine.

### Cytosine

|   |             |             |             |
|---|-------------|-------------|-------------|
| C | -1.04930300 | 1.18521500  | -0.00081100 |
| C | 0.20005300  | 1.71222900  | 0.00164200  |
| C | 1.18732900  | -0.53179900 | -0.00003900 |
| C | -1.12910800 | -0.25285900 | -0.00281300 |
| H | -1.92832600 | 1.81331900  | -0.01007900 |
| H | 0.39106800  | 2.77873700  | 0.00246400  |
| O | 2.21636700  | -1.17430000 | 0.00125500  |
| N | -2.35412300 | -0.84332900 | -0.03576700 |
| H | -2.37960100 | -1.84428800 | 0.07741100  |
| H | -3.18805100 | -0.31513400 | 0.15253100  |
| N | -0.08171100 | -1.04934100 | 0.00297500  |
| N | 1.27891200  | 0.89564300  | 0.00096600  |
| H | 2.21860000  | 1.26423300  | 0.00254200  |

### Cytosine-H<sub>2</sub>O

|   |             |             |             |
|---|-------------|-------------|-------------|
| C | 0.88252700  | -1.68779600 | -0.00006300 |
| C | 2.03802100  | -0.98042900 | -0.01059400 |
| C | 0.80091000  | 1.13109800  | 0.00509600  |
| C | -0.33963100 | -0.92471500 | 0.01118400  |
| H | 0.88158200  | -2.76812100 | 0.00092400  |
| H | 3.01497900  | -1.44852400 | -0.02143100 |
| O | 0.87176000  | 2.34281100  | 0.01078200  |
| N | -1.52630100 | -1.56313700 | 0.03398900  |
| H | -2.37512000 | -0.99621900 | -0.00331800 |
| H | -1.57340700 | -2.56389900 | -0.03712600 |
| N | -0.35919000 | 0.40287700  | 0.00900400  |
| N | 2.00866100  | 0.37372300  | -0.00709300 |
| H | 2.85739900  | 0.91981800  | -0.01468900 |
| O | -3.15771100 | 0.77764700  | -0.10896100 |
| H | -2.20469600 | 1.00710800  | -0.14098000 |
| H | -3.46628300 | 1.16297600  | 0.71701500  |

### TS0

|   |             |             |             |
|---|-------------|-------------|-------------|
| C | 0.61384000  | -1.76718500 | 0.00814500  |
| C | 1.84000000  | -1.19599100 | 0.00389100  |
| C | 0.89381300  | 1.06061600  | -0.00139700 |
| C | -0.53316300 | -0.89204700 | 0.00332200  |
| H | 0.49246500  | -2.84038300 | 0.01161900  |
| H | 2.75445700  | -1.77674400 | 0.00373000  |
| O | 1.09492000  | 2.25588300  | 0.00180200  |
| N | -1.78962200 | -1.28447000 | 0.00500600  |
| H | -2.53849800 | -0.27239700 | -0.02803700 |
| H | -1.95726900 | -2.27970700 | -0.01193200 |
| N | -0.33550500 | 0.46043400  | -0.00441200 |
| N | 1.98547100  | 0.15676500  | 0.00000100  |
| H | 2.89706200  | 0.58877900  | -0.00258800 |
| O | -2.71909000 | 0.95750600  | -0.09429500 |
| H | -1.46238900 | 1.00959400  | -0.04004500 |
| H | -3.10182300 | 1.30227900  | 0.71926900  |

### Cytosine\_tautomer-H<sub>2</sub>O

|   |             |             |             |
|---|-------------|-------------|-------------|
| C | 0.85195300  | -1.71589900 | 0.00606600  |
| C | 2.00359600  | -1.01804400 | 0.01310200  |
| C | 0.84792600  | 1.13152100  | -0.00490700 |
| C | -0.41915800 | -1.00755500 | -0.00543600 |
| H | 0.85688300  | -2.79608400 | 0.00913600  |
| H | 2.97556700  | -1.49516800 | 0.02203300  |
| O | 0.88715300  | 2.34138500  | -0.00625500 |
| N | -1.60138500 | -1.51820900 | -0.00606500 |
| H | -2.91552500 | -0.13447200 | -0.09934100 |
| H | -1.56272800 | -2.53317200 | -0.00680600 |
| N | -0.30993600 | 0.38663700  | -0.01550700 |
| N | 2.01228800  | 0.35352500  | 0.01019700  |
| H | 2.87415500  | 0.87603300  | 0.01591300  |
| O | -3.13083200 | 0.82272300  | -0.07788500 |
| H | -1.19604400 | 0.90594800  | -0.04156700 |
| H | -3.49554700 | 0.97024000  | 0.80042900  |

### R

|   |             |             |             |
|---|-------------|-------------|-------------|
| C | -0.72298000 | -0.40744200 | 0.00016700  |
| C | -1.31697200 | 0.92876700  | 0.01581800  |
| C | -0.52707200 | 2.01435400  | 0.02111500  |
| C | 1.51077300  | 0.68406100  | -0.01161400 |
| H | -2.39459600 | 1.00858300  | 0.02444400  |
| H | -0.91250700 | 3.02583200  | 0.03359600  |
| N | 0.85095300  | 1.90395000  | 0.01209700  |
| H | 1.44677300  | 2.71617600  | 0.01146600  |
| N | 0.68773700  | -0.40676900 | -0.01974000 |
| H | 1.16562700  | -1.31101700 | -0.04896800 |
| N | -1.32315400 | -1.53436900 | 0.00418100  |
| H | -2.32960800 | -1.36965200 | 0.01491200  |
| O | 2.73591100  | 0.62645100  | -0.02343600 |
| O | -4.39456300 | -0.61000100 | -0.00703600 |
| H | -4.70812100 | -1.13815100 | 0.73441400  |
| H | -4.65974900 | -1.10592400 | -0.78863200 |
| O | 2.99916500  | -2.16843100 | -0.07102300 |
| H | 3.25280900  | -1.22899800 | -0.11724000 |
| H | 3.24402500  | -2.43912100 | 0.81929200  |

### I1

|   |             |             |             |
|---|-------------|-------------|-------------|
| C | -0.30556300 | -0.38895800 | -0.00895600 |
| C | -0.34547200 | -1.80402300 | 0.01137100  |
| C | 0.84691400  | -2.46670300 | 0.00882400  |
| C | 2.12464800  | -0.40061800 | -0.03060400 |
| H | -1.29382900 | -2.31953800 | 0.02741300  |
| H | 0.90820000  | -3.54767400 | 0.02329900  |
| N | 2.02112200  | -1.79799700 | -0.01355600 |
| H | 2.90570600  | -2.29247200 | -0.01356700 |
| N | 0.87911000  | 0.24683100  | -0.02826100 |
| H | 0.96967500  | 1.29615300  | -0.01277800 |
| N | -1.45653400 | 0.31886800  | -0.00914900 |
| H | -2.37637300 | -0.16861600 | 0.01936000  |
| O | 3.17123300  | 0.18485200  | -0.04494100 |
| N | -1.41728000 | 1.72418500  | -0.07593000 |
| O | -2.50114100 | 2.20953600  | -0.07221000 |
| O | -3.66127500 | -1.38389900 | 0.06315800  |
| H | -4.25465800 | -1.48445900 | -0.69049800 |

Electronic Supplementary Material for PCCP  
This journal is © The Owner Societies 2009

|   |             |             |             |
|---|-------------|-------------|-------------|
| H | -4.22042900 | -1.46301600 | 0.84503100  |
| O | 1.65436500  | 2.79420000  | 0.15937300  |
| H | 2.61480500  | 2.80134500  | 0.07591300  |
| H | 1.33336700  | 3.65936200  | -0.11274800 |

**TS1**

|   |             |             |             |
|---|-------------|-------------|-------------|
| C | 0.10520600  | -0.64239600 | -0.00164600 |
| C | -0.29994300 | -1.99677200 | 0.01423300  |
| C | -1.63849600 | -2.26873900 | 0.00833300  |
| C | -2.22049700 | 0.08882800  | -0.02197000 |
| H | 0.43243400  | -2.78804100 | 0.01928800  |
| H | -2.02595800 | -3.27983500 | 0.01549000  |
| N | -2.55125700 | -1.27487700 | -0.00975200 |
| H | -3.54486900 | -1.47450100 | -0.01301000 |
| N | -0.83891200 | 0.32001900  | -0.01625300 |
| H | -0.59828500 | 1.34306700  | -0.00328600 |
| N | 1.43899900  | -0.35237200 | -0.00142200 |
| H | 2.79101200  | -1.16185700 | 0.06487500  |
| O | -3.04169400 | 0.96374300  | -0.03511900 |
| N | 1.70011100  | 0.95075000  | -0.09159300 |
| O | 2.90464700  | 1.23523500  | -0.10393700 |
| O | 3.83797400  | -1.04960000 | -0.00314200 |
| H | 4.31650300  | -1.37056300 | 0.77704400  |
| H | 3.78588700  | -0.00006200 | -0.03739700 |
| O | -0.83045600 | 2.99614700  | 0.15869000  |
| H | -1.75248000 | 3.26085900  | 0.06140700  |
| H | -0.28820800 | 3.71656400  | -0.17691300 |

**I2\_1**

|   |             |             |             |
|---|-------------|-------------|-------------|
| C | -2.34967100 | 0.10049000  | -0.00407900 |
| C | -0.04134700 | -0.66187800 | -0.01324900 |
| C | -0.44645700 | -2.00635700 | -0.00572100 |
| C | -1.79223400 | -2.26827800 | -0.00354500 |
| H | 0.29366100  | -2.79046900 | -0.00599600 |
| H | -2.19130200 | -3.27508300 | -0.00137900 |
| N | -0.96489100 | 0.31436100  | -0.00918200 |
| N | -2.69006800 | -1.26486700 | -0.00389900 |
| H | -3.68642800 | -1.45421700 | 0.00269800  |
| O | -3.16348800 | 0.98073200  | 0.00094700  |
| N | 1.32354600  | -0.40804000 | -0.00581400 |
| N | 1.58967600  | 0.81460600  | -0.19462400 |
| O | 2.85681400  | 1.08788000  | -0.17018400 |
| H | 3.43786500  | 0.26198000  | -0.01587300 |
| H | -0.70567100 | 1.33574000  | 0.00767400  |
| O | 4.59084300  | -0.83919400 | 0.12403500  |
| H | 4.83265100  | -1.19832200 | 0.98465500  |
| H | 5.41445300  | -0.72100600 | -0.36276600 |
| O | -0.83770100 | 2.98192700  | 0.18324900  |
| H | -0.25721500 | 3.65595300  | -0.18394300 |
| H | -1.73934900 | 3.31837100  | 0.12475000  |

**I2\_2**

|   |             |             |             |
|---|-------------|-------------|-------------|
| C | -1.61778600 | -1.26563700 | -0.00295200 |
| C | -0.76175900 | 0.99235300  | -0.04028800 |
| C | -2.04228400 | 1.53738800  | 0.13115500  |
| C | -3.09029700 | 0.65862200  | 0.24933900  |

Electronic Supplementary Material for PCCP  
This journal is © The Owner Societies 2009

|   |             |             |             |
|---|-------------|-------------|-------------|
| H | -2.17895100 | 2.60638100  | 0.16912000  |
| H | -4.11347700 | 0.98424700  | 0.39142100  |
| N | -0.57863500 | -0.32980800 | -0.10433500 |
| N | -2.88098100 | -0.66779500 | 0.18879400  |
| H | -3.65245700 | -1.32239700 | 0.26400100  |
| O | -1.46023700 | -2.45104300 | -0.07412500 |
| N | 0.29941900  | 1.89334600  | -0.18007100 |
| N | 1.42217400  | 1.38936900  | 0.04828800  |
| O | 2.41077300  | 2.23972300  | -0.13633000 |
| H | 2.03263700  | 3.09836400  | -0.43271700 |
| H | 0.39501900  | -0.79443200 | -0.28677500 |
| H | 2.44611000  | -1.53376500 | -0.19471400 |
| O | 1.58830800  | -1.61663100 | -0.67003200 |
| H | 1.41003200  | -2.55439700 | -0.79804400 |
| H | 4.75147900  | -1.14185200 | 0.08769800  |
| O | 3.95058700  | -1.31076100 | 0.59457700  |
| H | 4.23308300  | -1.76459400 | 1.39503500  |

### TS2

|   |             |             |             |
|---|-------------|-------------|-------------|
| C | 2.07543600  | 1.04196700  | 0.01570800  |
| C | 0.71497900  | -0.82488900 | -0.09620200 |
| C | 1.73486000  | -1.78642400 | -0.07313700 |
| C | 2.98930400  | -1.23406200 | 0.01664800  |
| H | 1.56158900  | -2.84948900 | -0.12285300 |
| H | 3.89047300  | -1.83397700 | 0.05036400  |
| N | 0.80195800  | 0.45584500  | -0.06113800 |
| N | 3.14260800  | 0.10129600  | 0.05810700  |
| H | 4.06863200  | 0.51120100  | 0.11654700  |
| O | 2.27248100  | 2.22240300  | 0.05429000  |
| N | -0.68979800 | -1.31039300 | -0.25978100 |
| N | -1.47489900 | -1.12338800 | 0.56871400  |
| O | -3.10123300 | -1.54793800 | -0.03042400 |
| H | -3.00611000 | -1.82404900 | -0.95858500 |
| H | -0.77420500 | 1.78596500  | -0.16740400 |
| H | -3.06301300 | 1.38435900  | 0.02335700  |
| O | -1.65349800 | 2.20112400  | -0.18151700 |
| H | -1.54001400 | 3.08565900  | 0.18130100  |
| H | -3.52941700 | -0.52795200 | 0.01299700  |
| O | -3.83441100 | 0.76095800  | 0.13523300  |
| H | -4.62120500 | 1.13284800  | -0.27579500 |

### I3\_1

|   |             |             |             |
|---|-------------|-------------|-------------|
| C | -1.19877300 | 1.26212100  | 0.01492600  |
| C | -0.87742500 | -0.98431200 | -0.27899000 |
| C | -2.20283400 | -1.39763700 | -0.08435000 |
| C | -3.04241300 | -0.34356800 | 0.18881600  |
| H | -2.53613200 | -2.42207000 | -0.13807200 |
| H | -4.10259000 | -0.46920600 | 0.36995700  |
| N | -0.36038800 | 0.18310100  | -0.26073400 |
| N | -2.55735800 | 0.91083300  | 0.23238800  |
| H | -3.17540600 | 1.69254600  | 0.42660500  |
| O | -0.83936100 | 2.41000900  | 0.07327300  |
| N | 0.11433700  | -2.04171200 | -0.57647900 |
| N | 1.09742500  | -2.55061400 | -0.44417300 |
| O | 2.05165100  | -1.54909700 | 1.22643800  |
| H | 2.72519200  | -2.15839100 | 1.55305300  |
| H | 2.37066900  | 3.29769800  | 0.55281300  |

Electronic Supplementary Material for PCCP  
This journal is © The Owner Societies 2009

|   |            |             |             |
|---|------------|-------------|-------------|
| H | 2.68880200 | 1.12122900  | -0.31281700 |
| O | 2.06107300 | 2.69459100  | -0.12949100 |
| H | 1.09498600 | 2.77198700  | -0.13999100 |
| H | 2.53271400 | -0.84803100 | 0.68881800  |
| O | 3.01987000 | 0.19684600  | -0.41644400 |
| H | 3.92646400 | 0.26456700  | -0.72998700 |

### I3\_2

|   |             |             |             |
|---|-------------|-------------|-------------|
| C | -0.11007500 | -1.67781700 | -0.32932100 |
| C | 1.20177000  | 0.18540200  | -0.32296800 |
| C | 2.22014300  | -0.27236600 | 0.52194800  |
| C | 2.00936200  | -1.57570000 | 0.90156200  |
| H | 3.06206600  | 0.31652600  | 0.84828700  |
| H | 2.69430800  | -2.11503400 | 1.54387800  |
| N | 0.16366000  | -0.38339000 | -0.78247700 |
| N | 0.91292500  | -2.23673400 | 0.48193300  |
| H | 0.75031900  | -3.19473200 | 0.77546000  |
| O | -1.11051500 | -2.29201000 | -0.58507500 |
| N | 1.39797300  | 1.55438600  | -0.92413800 |
| N | 1.52651600  | 2.47739000  | -1.50021200 |
| O | 0.21463400  | 2.20308100  | 1.08064200  |
| H | 0.37725900  | 2.41140000  | 2.00604900  |
| H | -4.15847700 | -0.93080300 | -0.05482600 |
| H | -2.74832600 | 0.92195300  | 0.45938300  |
| O | -3.39279400 | -0.45948100 | -0.39743600 |
| H | -2.79639800 | -1.13865300 | -0.74175200 |
| H | -0.76585600 | 2.05141700  | 1.00872500  |
| O | -2.38222500 | 1.72320400  | 0.89320800  |
| H | -2.98241600 | 2.44090500  | 0.67102200  |

### TS3

|   |             |             |             |
|---|-------------|-------------|-------------|
| C | -0.44253900 | -1.60891300 | -0.39819000 |
| C | 1.20596000  | -0.07210700 | -0.25231200 |
| C | 2.12690900  | -0.71735400 | 0.56297800  |
| C | 1.63414500  | -1.96305500 | 0.86927800  |
| H | 3.05486100  | -0.31413400 | 0.93123400  |
| H | 2.17639500  | -2.65671400 | 1.50016900  |
| N | 0.13027100  | -0.36765300 | -0.76393500 |
| N | 0.43272500  | -2.37924900 | 0.40453800  |
| H | 0.08419400  | -3.29855100 | 0.65498900  |
| O | -1.52893300 | -1.98920200 | -0.72103400 |
| N | 1.83490600  | 1.45093500  | -0.92592600 |
| N | 2.09567100  | 2.36072300  | -1.47631900 |
| O | 0.58347500  | 1.85625800  | 1.22470000  |
| H | 0.76563400  | 2.10247900  | 2.13703500  |
| H | -4.34256000 | -0.14600800 | -0.05291800 |
| H | -2.58215900 | 1.40735300  | 0.47371500  |
| O | -3.50024300 | 0.18150600  | -0.38283600 |
| H | -3.06223300 | -0.57393500 | -0.79560700 |
| H | -0.39321600 | 1.98451500  | 1.10133900  |
| O | -2.03891600 | 2.10972600  | 0.88944800  |
| H | -2.42583700 | 2.94396400  | 0.60879400  |

### P

|   |            |            |             |
|---|------------|------------|-------------|
| C | 1.44738300 | 0.99882700 | -0.00322700 |
|---|------------|------------|-------------|

|   |             |             |             |
|---|-------------|-------------|-------------|
| C | -0.69906000 | 0.13298300  | -0.01336100 |
| C | -1.29604800 | 1.42512000  | 0.00044300  |
| C | -0.44251800 | 2.48392900  | 0.01111900  |
| H | -2.36677200 | 1.56614500  | 0.00121100  |
| H | -0.77150200 | 3.51473300  | 0.02094600  |
| N | 0.61078600  | -0.06192700 | -0.01399800 |
| N | 0.89617800  | 2.27127600  | 0.00907900  |
| H | 1.55095000  | 3.04436600  | 0.01377200  |
| O | 2.69290000  | 0.91755100  | -0.00443800 |
| N | -4.44021100 | -0.80252900 | 0.00450200  |
| N | -5.52350800 | -0.95891800 | 0.01349200  |
| O | -1.41603600 | -0.97764600 | -0.02768500 |
| H | -2.37277600 | -0.80819900 | -0.01844000 |
| H | 4.48482500  | -1.34282300 | 0.60921200  |
| H | 3.08295400  | -1.96168900 | -0.02768700 |
| O | 3.83151400  | -1.23629600 | -0.09426000 |
| H | 3.33748800  | -0.26088000 | -0.05193800 |
| H | 1.15617600  | -1.96458300 | 0.06852500  |
| O | 1.82480800  | -2.67920700 | 0.10711200  |
| H | 1.57190900  | -3.36274500 | -0.52279000 |

### Uracil (enol form)

|   |             |             |             |
|---|-------------|-------------|-------------|
| N | -0.03430900 | 0.03819900  | 0.03352000  |
| C | -0.02122300 | -0.01995400 | 1.38212500  |
| H | 0.94621700  | 0.01038800  | 1.86846000  |
| C | -1.19284800 | -0.11189700 | 2.06479900  |
| H | -1.21349300 | -0.15979400 | 3.14458300  |
| N | -2.40523100 | -0.08496300 | -0.03584500 |
| C | -1.23239200 | 0.00848400  | -0.74958400 |
| O | -1.13869700 | 0.06597700  | -1.95411700 |
| H | 0.82195000  | 0.10720000  | -0.49775200 |
| C | -2.38157200 | -0.14001700 | 1.26018600  |
| O | -3.58678400 | -0.22978800 | 1.86016600  |
| H | -3.47271500 | -0.26353200 | 2.81596900  |

### Uracil

|   |             |             |             |
|---|-------------|-------------|-------------|
| N | -0.02736700 | 0.00043100  | 0.00126400  |
| C | -0.01274800 | 0.00021500  | 1.37499400  |
| H | 0.97052500  | -0.00015100 | 1.82835100  |
| C | -1.14724600 | 0.00036400  | 2.10048000  |
| H | -1.13583900 | 0.00018500  | 3.17941300  |
| N | -2.34061300 | 0.00065500  | 0.01849700  |
| C | -1.19645200 | 0.00133200  | -0.76015200 |
| O | -1.19062900 | 0.00009700  | -1.96991400 |
| H | 0.82860200  | 0.00004500  | -0.53178200 |
| C | -2.44280100 | 0.00035700  | 1.42830600  |
| O | -3.52975400 | 0.00035000  | 1.96562500  |
| H | -3.21497300 | 0.00032700  | -0.49115000 |
